# Supplementary material
Source: PubMed Central journal article supplement (PMC3956109)
Supplement: NIHMS557673-supplement-01.pdf [file NIHMS557673-supplement-01.pdf]

**Table S1.** Genotype and phenotype information for research participants.

| Patient No      | CC score <sup>b</sup> | Age | Sex | PTEN Genotype           | FSIQ | Macrocephaly | Brain MRI Findings | Prior Brain Surgery | Lhermitte-Duclos | Breast-Malignant | Breast-Benign | Thyroid-Malignant | Thyroid-Benign | Trichilemmoma | Acral keratoses | Oral papillomatosis | Lipomas | Fibromas | Penile freckling | AVM/vascular lesion | Glycogenic acanthosis | GI hamartomas | GI polyps-other | Colorectal cancer | Uterine cancer | Uterine fibroids | Renal cell cancer | Other G/U tumor/malformation |
|-----------------|-----------------------|-----|-----|-------------------------|------|--------------|--------------------|---------------------|------------------|------------------|---------------|-------------------|----------------|---------------|-----------------|---------------------|---------|----------|------------------|---------------------|-----------------------|---------------|-----------------|-------------------|----------------|------------------|-------------------|------------------------------|
| 1               | 50                    | 60  | M   | c.395G>A p.(Gly132Asp)  |      | Y            | M                  |                     |                  |                  |               | Y                 | Y              | Y             | Y               |                     | Y       |          |                  | Y                   | Y                     | Y             |                 |                   |                |                  | Y-63              | Y                            |
| 2               | 37                    | 41  | F   | c.389G>A p.(Arg130Gln)  | 112  | Y            |                    |                     |                  | Y-29             | Y             | Y                 | Y              | Y             | Y               |                     |         |          |                  |                     |                       | Y             |                 |                   | Y              |                  |                   | Y                            |
| 3               | 24                    | 54  | F   | c.388C>T p.(Arg130Ter)  | 90   | Y            | M                  | Y                   |                  | Y-50,52          | Y             | Y                 |                |               | Y               | Y                   |         |          |                  |                     |                       | Y             |                 |                   | Y              |                  |                   | Y                            |
| 4               | 38                    | 30  | F   | c.287C>G p.(Pro96Arg)   | 112  | Y            |                    |                     |                  |                  | Y             | Y                 | Y              | Y             | Y               | Y                   |         |          |                  | Y                   |                       | Y             | Y               |                   |                |                  |                   |                              |
| 5               | 22                    | 29  | F   | No mutation             | 107  |              |                    |                     |                  |                  | Y             | Y                 |                |               |                 |                     | Y       |          |                  | Y                   | Y                     | Y             |                 |                   |                |                  |                   | Y                            |
| 6               | 28                    | 23  | M   | c.382A>G p.(Lys128Glu)  | 79   | Y            | CH                 |                     |                  |                  |               | Y                 |                |               | Y               | Y                   |         |          |                  | Y                   |                       | Y             |                 |                   |                |                  |                   |                              |
| 7               | 28                    | 44  | F   | c.634+1G>C              | 116  | Y            |                    |                     |                  | Y-43             | Y             | Y                 |                |               | Y               | Y                   |         |          |                  |                     |                       |               |                 |                   |                |                  | Y-44              |                              |
| 8               | N/A                   | 5   | M   | c.18_19delAG            | 80   | Y            | CH                 |                     |                  |                  |               |                   |                |               |                 |                     | Y       |          |                  |                     |                       |               |                 |                   |                |                  |                   | Y                            |
| 9               | 22                    | 44  | F   | No mutation             | 135  | Y            | N                  |                     |                  | Y-38             | Y             | Y-27              |                | Y             | Y               |                     | Y       | Y        |                  |                     |                       |               |                 |                   | Y              |                  |                   |                              |
| 10              | 46                    | 58  | F   | c.697C>T p.(Arg233Ter)  | 111  | Y            |                    |                     |                  | Y-56             | Y             |                   | Y              | Y             |                 | Y                   | Y       | Y        |                  |                     | Y                     | Y             | Y               | Y-34              | Y-53           |                  |                   |                              |
| 11              | N/A                   | 16  | F   | c.892C>T p.(Gln298Ter)  | 85   | Y            | V,C                |                     |                  |                  |               |                   | Y              |               |                 | Y                   | Y       |          |                  | Y                   |                       | Y             |                 |                   |                |                  |                   |                              |
| 12              | 18                    | 45  | F   | c.697C>T p.(Arg233Ter)  | 65   | Y            | P                  | Y                   | P                | Y-44             | Y             | Y-42              | Y              |               |                 | Y                   | Y       |          |                  |                     |                       |               |                 |                   |                |                  |                   |                              |
| 13              | 17                    | 58  | F   | c.1033C>G p.(Leu345Val) | 112  |              |                    |                     |                  | Y-46             | Y             | Y                 | Y              |               | Y               | Y                   |         |          |                  |                     |                       | Y             |                 | Y-41              | Y              |                  |                   |                              |
| 14              | 37                    | 46  | F   | c.401T>C, p.(Met134Thr) | 118  | Y            |                    |                     |                  | Y-43             | Y             | Y-46              | Y              | Y             | Y               | Y                   |         | Y        |                  | Y                   | Y                     | Y             | Y               |                   | Y              |                  |                   | Y                            |
| 15              | 25                    | 58  | F   | Whole gene deletion     | 107  | Y            |                    |                     |                  | Y-56             | Y             | Y                 | Y              | Y             | Y               | Y                   | Y       |          |                  | Y                   |                       | Y             | Y               |                   |                | Y                |                   |                              |
| 16              | 46                    | 44  | F   | c.734_737del4           | 103  | Y            | N                  |                     |                  |                  | Y             | Y-41              | Y              | Y             |                 | Y                   |         | Y        |                  |                     |                       |               |                 | Y-38              |                |                  |                   |                              |
| 17              | 32                    | 36  | F   | c.865_871delAAAGTAG     | 108  | Y            | V                  |                     |                  |                  | Y             | Y-36              | Y              |               |                 | Y                   |         |          |                  | Y                   |                       | Y             |                 |                   |                |                  |                   | Y                            |
| 18              | N/A                   | 17  | F   | c.1003C>T p.(Arg335Ter) | 113  | Y            | V,C                |                     |                  |                  | Y             |                   | Y              |               |                 | Y                   |         |          |                  | Y                   |                       |               |                 |                   |                |                  |                   |                              |
| 19              | 62                    | 50  | M   | c.253+1G>A              | 78   | Y            | LD                 | Y                   | Y                |                  |               | Y-44              | Y              |               | Y               | Y                   | Y       |          |                  |                     | Y                     | Y             | Y               |                   |                |                  |                   |                              |
| 20              | N/A                   | 14  | M   | c.919G>T p.(Glu307Ter)  | 94   | Y            | CH,C               | Y                   |                  |                  |               |                   | Y              |               |                 |                     |         | Y        |                  |                     | Y                     | Y             |                 |                   |                |                  |                   | Y                            |
| 21              | N/A                   | 5   | M   | c.955_958del4           | 107  | Y            | PI                 |                     |                  |                  |               |                   |                |               |                 |                     | Y       |          | Y                |                     |                       |               |                 |                   |                |                  |                   | Y                            |
| 22 <sup>a</sup> | 44                    | 25  | F   | c.253+1G>C              | 116  | Y            |                    |                     |                  |                  | Y             | Y                 | Y              |               | Y               | Y                   |         |          |                  | Y                   |                       | Y             |                 |                   |                |                  |                   |                              |
| 23 <sup>a</sup> | 44                    | 57  | M   | c.253+1G>C              | 133  | Y            |                    |                     |                  |                  |               |                   | Y              |               | Y               |                     | Y       |          | Y                | Y                   |                       | Y             |                 |                   |                |                  |                   |                              |
| 24              | 31                    | 51  | F   | Exon 2 deletion         | 101  | Y            | N                  |                     |                  | Y-44             | Y             | Y                 | Y              | Y             | Y               | Y                   | Y       |          |                  |                     |                       | Y             | Y               |                   |                |                  |                   |                              |
| 25              | 27                    | 26  | F   | c.486_487delCA          | 95   | Y            |                    |                     |                  |                  | Y             | Y                 | Y              |               |                 | Y                   |         | Y        |                  | Y                   |                       |               |                 |                   |                |                  |                   |                              |

<sup>a</sup>Subjects related to each other (daughter and father); <sup>b</sup>Cleveland Clinic *PTEN* risk score (<http://www.lerner.ccf.org/gmi/ccscore/>) or *PTEN* CC Score calculates a priori likelihood of carrying a germline *PTEN* mutation based on multiple logistic regression approaches, taking into account age of tumor onset and relative prevalence of the component phenotype in the general population<sup>24</sup>; not applicable (N/A) for pediatric subjects; Y=phenotype present; FSIQ=Full Scale IQ; M=meningioma; CH=Chari I malformation; N=no abnormality; V=venous anomaly/angioma; C=cystic lesion; P=probable presence; LD=Lhermitte-Duclos; PI=perinatal ischemia; numbers signify age at diagnosis

**Table S2.** Neuropsychological test scores for research participants.

| Patient No      | Full Scale IQ | Working Memory Index | Processing Speed Index | Trail Making – Part A | Boston Naming Test | Semantic Fluency | Verbal Comprehension Index or VIQ | Controlled Oral Word Association Test | Wisconsin card Sorting Test – Perseverative Errors | Trail Making – Part B | Ruff Figural Fluency Test – Unique Designs | Judgment of Line Orientation | Perceptual Organization Index or PIQ | General Memory Index | Auditory Delayed Recognition Index | Auditory Verbal Learning Test – Immediate Recall | Auditory Verbal Learning Test – Delayed Recall | Auditory Verbal Learning Test – Delayed Recognition | Reading | Spelling | Sentence Comprehension | Math Computation | Finger Tapping – Dominant Hand | Finger Tapping – Non Dominant Hand | Grooved Pegboard – Dominant Hand | Grooved Pegboard – Non Dominant Hand |
|-----------------|---------------|----------------------|------------------------|-----------------------|--------------------|------------------|-----------------------------------|---------------------------------------|----------------------------------------------------|-----------------------|--------------------------------------------|------------------------------|--------------------------------------|----------------------|------------------------------------|--------------------------------------------------|------------------------------------------------|-----------------------------------------------------|---------|----------|------------------------|------------------|--------------------------------|------------------------------------|----------------------------------|--------------------------------------|
| 1               | --            | --                   | 111                    | 93                    | 80                 | 110              | --                                | 83                                    | 95                                                 | 99                    | 102                                        | 96                           | --                                   | 111                  | 110                                | 110                                              | 101                                            | 104                                                 | 113     | 109      | 125                    | 98               | 94                             | 78                                 | 90                               | 72                                   |
| 2               | 112           | 111                  | 111                    | 129                   | 94                 | 103              | 108                               | 102                                   | 95                                                 | 100                   | 105                                        | 116                          | 114                                  | 96                   | 90                                 | 82                                               | 84                                             | 86                                                  | 108     | 124      | 99                     | 115              | 94                             | 106                                | 66                               | 90                                   |
| 3               | 90            | 82                   | 96                     | 97                    | 57                 | 78               | 91                                | 58                                    | 72                                                 | 73                    | 78                                         | 108                          | 91                                   | 78                   | 85                                 | 72                                               | 87                                             | 111                                                 | 102     | 109      | 94                     | 85               | 85                             | 81                                 | 81                               | 58                                   |
| 4               | 112           | 92                   | 106                    | 102                   | 117                | 114              | 110                               | 83                                    | 85                                                 | 99                    | 93                                         | 73                           | 113                                  | 96                   | 110                                | 72                                               | 78                                             | 64                                                  | 103     | 100      | 102                    | 58               | 88                             | 94                                 | 91                               | 75                                   |
| 5               | 107           | 94                   | 114                    | 85                    | 106                | 114              | 113                               | 93                                    | 90                                                 | 75                    | 87                                         | 80                           | 98                                   | 95                   | 110                                | 98                                               | 99                                             | 114                                                 | 99      | 100      | 117                    | 91               | 84                             | 97                                 | 100                              | 94                                   |
| 6               | 79            | 73                   | 71                     | 75                    | 63                 | 86               | 91                                | 74                                    | 55                                                 | 55                    | 67                                         | 62                           | 68                                   | 75                   | 85                                 | 65                                               | 68                                             | 74                                                  | 63      | 65       | 72                     | 59               | 60                             | 70                                 | 60                               | 55                                   |
| 7               | 116           | 124                  | 93                     | 70                    | 102                | 131              | 116                               | 113                                   | 98                                                 | 85                    | 99                                         | 116                          | 114                                  | 122                  | 110                                | 124                                              | 120                                            | 107                                                 | 112     | 117      | 126                    | 118              | 84                             | 96                                 | 90                               | 82                                   |
| 8               | 80            | --                   | 85                     | --                    | --                 | --               | 81                                | --                                    | --                                                 | --                    | --                                         | --                           | 79                                   | 77                   | 72                                 | --                                               | --                                             | --                                                  | --      | --       | --                     | --               | --                             | --                                 | --                               | --                                   |
| 9               | 135           | 117                  | 111                    | 111                   | 117                | 111              | 134                               | 110                                   | 92                                                 | 93                    | --                                         | 116                          | 128                                  | 118                  | 120                                | 107                                              | 114                                            | 114                                                 | 123     | 111      | 126                    | 112              | --                             | --                                 | 100                              | 90                                   |
| 10              | 111           | 115                  | 106                    | 100                   | 116                | 103              | 125                               | 114                                   | 71                                                 | 115                   | 103                                        | 88                           | 92                                   | 96                   | 110                                | 76                                               | 91                                             | 94                                                  | 134     | 138      | 113                    | 120              | 81                             | 88                                 | 78                               | 81                                   |
| 11              | 85            | 84                   | 91                     | 93                    | 100                | 108              | 89                                | 99                                    | 126                                                | 99                    | 71                                         | 102                          | 81                                   | 109                  | 110                                | 94                                               | 119                                            | 110                                                 | 100     | 101      | 84                     | 101              | 84                             | --                                 | 71                               | --                                   |
| 12              | 65            | 75                   | 66                     | 87                    | <55                | 61               | 72                                | 74                                    | --                                                 | 58                    | 66                                         | --                           | 63                                   | 69                   | 65                                 | 61                                               | 54                                             | 80                                                  | 88      | 91       | 71                     | 80               | 106                            | 96                                 | 57                               | 55                                   |
| 13              | 112           | 104                  | 106                    | 94                    | 103                | 77               | 110                               | 93                                    | 100                                                | 90                    | 92                                         | 116                          | 114                                  | 107                  | 115                                | 92                                               | 82                                             | 105                                                 | 113     | 111      | 100                    | 100              | 93                             | 94                                 | 78                               | 94                                   |
| 14              | 118           | 115                  | 120                    | 105                   | 112                | 103              | 111                               | 109                                   | 69                                                 | 121                   | 123                                        | 108                          | 125                                  | 107                  | 115                                | 97                                               | 90                                             | 86                                                  | 114     | 115      | 125                    | 130              | 133                            | 117                                | 87                               | 87                                   |
| 15              | 107           | 94                   | 91                     | 90                    | 112                | 95               | 104                               | 79                                    | 106                                                | 106                   | 92                                         | 102                          | 110                                  | 120                  | 110                                | 94                                               | 104                                            | 116                                                 | 93      | 94       | 104                    | 100              | 85                             | 93                                 | 82                               | 81                                   |
| 16              | 103           | 126                  | 111                    | 133                   | 83                 | 106              | 103                               | 60                                    | 72                                                 | 136                   | 85                                         | 88                           | 104                                  | 89                   | 95                                 | 84                                               | 72                                             | 66                                                  | 106     | 106      | 104                    | 104              | 102                            | 102                                | 69                               | 82                                   |
| 17              | 108           | 108                  | 103                    | 111                   | 87                 | 86               | 111                               | 78                                    | 101                                                | 108                   | 88                                         | 96                           | 104                                  | 125                  | 130                                | 83                                               | 67                                             | 103                                                 | 112     | 111      | 126                    | 122              | 118                            | 118                                | 85                               | 91                                   |
| 18              | 113           | 119                  | 120                    | 91                    | 104                | 95               | 113                               | 85                                    | 111                                                | 114                   | 91                                         | 96                           | 111                                  | 122                  | 110                                | 109                                              | 107                                            | 103                                                 | 105     | 107      | 101                    | 117              | 109                            | 116                                | 87                               | 92                                   |
| 19              | 78            | 80                   | 76                     | 87                    | 93                 | 72               | 88                                | 98                                    | 75                                                 | 81                    | --                                         | --                           | 70                                   | 69                   | 75                                 | 81                                               | 57                                             | 76                                                  | 94      | --       | --                     | --               | --                             | --                                 | 61                               | 64                                   |
| 20              | 94            | 107                  | 97                     | 106                   | 79                 | 82               | 87                                | 63                                    | 80                                                 | 99                    | --                                         | --                           | 96                                   | 118                  | 115                                | --                                               | --                                             | --                                                  | 114     | 101      | 102                    | 103              | 113                            | 117                                | 109                              | 113                                  |
| 21              | 107           | --                   | 110                    | --                    | --                 | --               | 98                                | --                                    | --                                                 | --                    | --                                         | --                           | 116                                  | --                   | 94                                 | --                                               | --                                             | --                                                  | --      | --       | --                     | --               | --                             | --                                 | --                               | --                                   |
| 22 <sup>a</sup> | 116           | 109                  | 106                    | 105                   | 58                 | 92               | 119                               | 102                                   | 99                                                 | 106                   | 81                                         | 116                          | 110                                  | 112                  | 120                                | 101                                              | 99                                             | 105                                                 | 105     | 112      | 128                    | 107              | 84                             | 91                                 | 72                               | 75                                   |
| 23 <sup>a</sup> | 133           | 124                  | 103                    | 112                   | 119                | 95               | 144                               | 124                                   | 95                                                 | 99                    | 133                                        | 108                          | 111                                  | 127                  | 115                                | 101                                              | 97                                             | 98                                                  | 134     | 120      | 125                    | 120              | 94                             | 106                                | 66                               | 100                                  |
| 24              | 101           | 97                   | 93                     | 84                    | 90                 | 103              | 106                               | 85                                    | 89                                                 | 99                    | 85                                         | 102                          | 94                                   | 95                   | 110                                | 106                                              | 109                                            | 111                                                 | 93      | 109      | 112                    | 98               | 87                             | 82                                 | 84                               | 78                                   |
| 25              | 95            | 106                  | 84                     | 102                   | 84                 | 84               | 95                                | 71                                    | 97                                                 | 73                    | 86                                         | 116                          | 94                                   | 101                  | 110                                | 101                                              | 99                                             | 114                                                 | 91      | 91       | 85                     | 101              | 93                             | 105                                | 75                               | 88                                   |

All scores are reported as standard scores (mean = 100, standard deviation = 15)

**Table S3.** Performance of individuals with PHTS on individual neuropsychological measures compared to expected proportions and mean scores in normal control samples.

| Domain                          | Test                                         | Measure                              | N  | Above               | Avg            | Below         | $\chi^2$ (p)        | M (SD)              | t (p)               |
|---------------------------------|----------------------------------------------|--------------------------------------|----|---------------------|----------------|---------------|---------------------|---------------------|---------------------|
|                                 |                                              |                                      |    | Avg                 | Avg            | Avg           |                     |                     |                     |
|                                 |                                              |                                      |    | Observed (Expected) |                |               |                     |                     |                     |
| <b>Intelligence</b>             | Wechsler Scales                              | Full Scale IQ                        | 24 | 5 (4)               | 15 (16)        | 4 (4)         | 0.32 (.953)         | 103.2 (17.2)        | 0.92 (.370)         |
| <b>Attention/Working Memory</b> | Wechsler Scales                              | Working Memory Index                 | 22 | 6 (4)               | 11 (15)        | 5 (4)         | 2.38 (.337)         | 102.6 (16.4)        | 0.73 (.474)         |
| <b>Processing Speed</b>         | Wechsler Scales                              | Processing Speed Index               | 25 | 2 (4)               | 19 (17)        | 4 (4)         | 1.24 (.652)         | 99.2 (14.5)         | -0.26 (.796)        |
|                                 | Trail Making Test                            | Part A                               | 23 | 2 (4)               | 18 (16)        | 3 (4)         | 1.52 (.525)         | 98.5 (15.1)         | -0.48 (.635)        |
| <b>Language</b>                 | Boston Naming Test                           | Total Score                          | 25 | 4 (4)               | 13 (17)        | 8 (4)         | 4.94 (.082)         | 91.3 (23.7)         | -1.77 (.090)        |
|                                 | Semantic Fluency                             | Total Score                          | 23 | 1 (4)               | 16 (16)        | 6 (4)         | 3.35 (.193)         | 96.0 (16.2)         | -1.18 (.252)        |
|                                 | Wechsler Scales                              | Verbal Comprehension Index or VIQ    | 24 | 6 (4)               | 16 (16)        | 2 (4)         | 2.10 (.349)         | 104.96 (16.7)       | 1.45 (.159)         |
| <b>Executive Functioning</b>    | Controlled Oral Word Association             | Total Score                          | 23 | <b>1 (4)</b>        | <b>12 (16)</b> | <b>10 (4)</b> | <b>12.74 (.002)</b> | 89.0 (18.3)         | 1.82 (.083)         |
|                                 | Wisconsin Card Sorting Test                  | Perseverative Errors                 | 22 | 1 (4)               | 14 (15)        | 7 (4)         | 4.73 (.094)         | <b>89.7 (16.2)</b>  | <b>-2.99 (.007)</b> |
|                                 | Trail Making Test                            | Part B                               | 23 | 2 (4)               | 14 (15)        | 7 (4)         | 3.32 (.197)         | 94.3 (19.6)         | -1.41 (.173)        |
|                                 | Ruff Figural Fluency Test                    | Unique Designs                       | 20 | 2 (3)               | 13 (14)        | 5 (3)         | 1.74 (.453)         | <b>91.8 (16.4)</b>  | <b>-2.25 (.036)</b> |
| <b>Visuospatial</b>             | Judgment of Line Orientation                 | Total Score                          | 20 | 6 (3)               | 11 (14)        | 3 (3)         | 3.64 (.182)         | 100.25 (15.6)       | 0.07 (.944)         |
|                                 | Wechsler Scales                              | Perceptual Organization Index or PIQ | 24 | 4 (4)               | 15 (16)        | 5 (4)         | 0.31 (.953)         | 100.00 (17.3)       | 0.00 (1.000)        |
| <b>Memory Recall</b>            | WMS-III or CMS                               | General Memory Index                 | 24 | 7 (4)               | 12 (16)        | 5 (4)         | 3.50 (.161)         | 101.4 (18.1)        | 0.38 (.705)         |
|                                 | Auditory Verbal Learning Test                | Immediate Recall                     | 22 | <b>1 (4)</b>        | <b>12 (15)</b> | <b>9 (4)</b>  | <b>9.47 (.009)</b>  | <b>91.3 (16.2)</b>  | <b>-2.52 (.020)</b> |
|                                 |                                              | Delayed Recall                       | 22 | 2 (4)               | 12 (15)        | 8 (4)         | 5.81 (.059)         | <b>90.9 (19.0)</b>  | <b>-2.26 (.035)</b> |
| <b>Memory Recognition</b>       | WMS-III or CMS                               | Auditory Delayed Recognition Index   | 24 | 3 (4)               | 18 (16)        | 3 (4)         | .750 (.716)         | 103.6 (16.5)        | 1.11 (.280)         |
|                                 | Auditory Verbal Learning Test                | Delayed Recognition                  | 22 | 1 (4)               | 16 (15)        | 5 (4)         | 2.64 (.282)         | 97.3 (16.5)         | -0.78 (.447)        |
| <b>Academic</b>                 | Wide Range Achievement Test – Fourth Edition | Reading                              | 23 | 3 (4)               | 16 (16)        | 1 (4)         | 3.15 (.241)         | 105.2 (15.3)        | 1.62 (.119)         |
|                                 |                                              | Spelling                             | 22 | 4 (4)               | 17 (15)        | 1 (4)         | 2.59 (.311)         | <b>106.5 (14.3)</b> | <b>2.12 (.046)</b>  |
|                                 |                                              | Sentence Comprehension               | 22 | 8 (4)               | 11 (15)        | 3 (4)         | 5.51 (.073)         | 106.4 (17.7)        | 1.70 (.104)         |
|                                 |                                              | Math Computation                     | 22 | 6 (4)               | 13 (15)        | 3 (4)         | 1.54 (.521)         | 101.8 (18.7)        | 0.45 (.661)         |
| <b>Motor</b>                    | Finger Tapping Test                          | Dominant Hand                        | 21 | 2 (3)               | 13 (14)        | 6 (3)         | 3.20 (.203)         | 93.9 (15.6)         | -1.81 (.086)        |
|                                 |                                              | Non Dominant Hand                    | 21 | 3 (3)               | 13 (14)        | 4 (3)         | 0.41 (.940)         | 97.4 (13.7)         | -0.86 (.398)        |
|                                 | Grooved Pegboard                             | Dominant Hand                        | 23 | <b>0 (4)</b>        | <b>9 (16)</b>  | <b>14 (4)</b> | <b>32.57 (.000)</b> | <b>80.0 (13.6)</b>  | <b>-7.05 (.000)</b> |
|                                 |                                              | Non Dominant Hand                    | 22 | <b>0 (4)</b>        | <b>10 (15)</b> | <b>12 (4)</b> | <b>21.54 (.000)</b> | <b>81.7 (14.7)</b>  | <b>-5.86 (.000)</b> |

Wechsler Scales=Wechsler Adult Intelligence Scale – Third Edition, Wechsler Intelligence Scale for Children – Fourth Edition, or Wechsler Preschool and Primary Scale of Intelligence; WMS-III=Wechsler Memory Scale – Third Edition; CMS=Children’s Memory Scale. Values under each descriptive category (i.e., Above Average, Average, Below Average) represent the number of subjects who scored within that range on that measure. The numbers in parentheses represent the expected number of subjects to fall within that category based on normal control data. All chi-square analyses were conducted by comparing the observed scores within each category to the expected proportions in the normal population based on the normal curve (i.e., 16% Above Average, 68% Average, 16% Below Average).
